# Supplementary material for: TaCAMTA4, a Calmodulin-Interacting Protein, Involved in Defense Response of Wheat to Puccinia triticina
Source: PubMed Central journal article supplement (PMC6345913; doi:10.1038/s41598-018-36385-1), 2019-01-24
Supplement: 41598_2018_36385_MOESM1_ESM.pdf [file 41598_2018_36385_MOESM1_ESM.pdf]

# **TaCAMTA4, a Calmodulin-Interacting Protein, Involved in Defense Response of Wheat to *Puccinia triticina***

**Yuelin Wang<sup>1†</sup>, Fengju Wei<sup>1†\*</sup>, Hui Zhou<sup>1†</sup>, Na Liu<sup>1</sup>, Xiaonan Niu<sup>1</sup>, Chao Yan<sup>1</sup>, Lifeng Zhang<sup>1</sup>, Shengfang Han<sup>1</sup>, Chunyan Hou<sup>1\*</sup>, Dongmei Wang<sup>1\*</sup>**

\*Corresponding author: weifj98@126.com (F J. Wei); houchunyan@126.com (C Y. Hou); dongmeiwang63@126.com (D M. Wang);

**S1 Figure. Yeast two-hybrid interactions between TaCAM4-1 and prey proteins.**  
 These are the original photos in Figure 1. The same number represents the same prey protein.

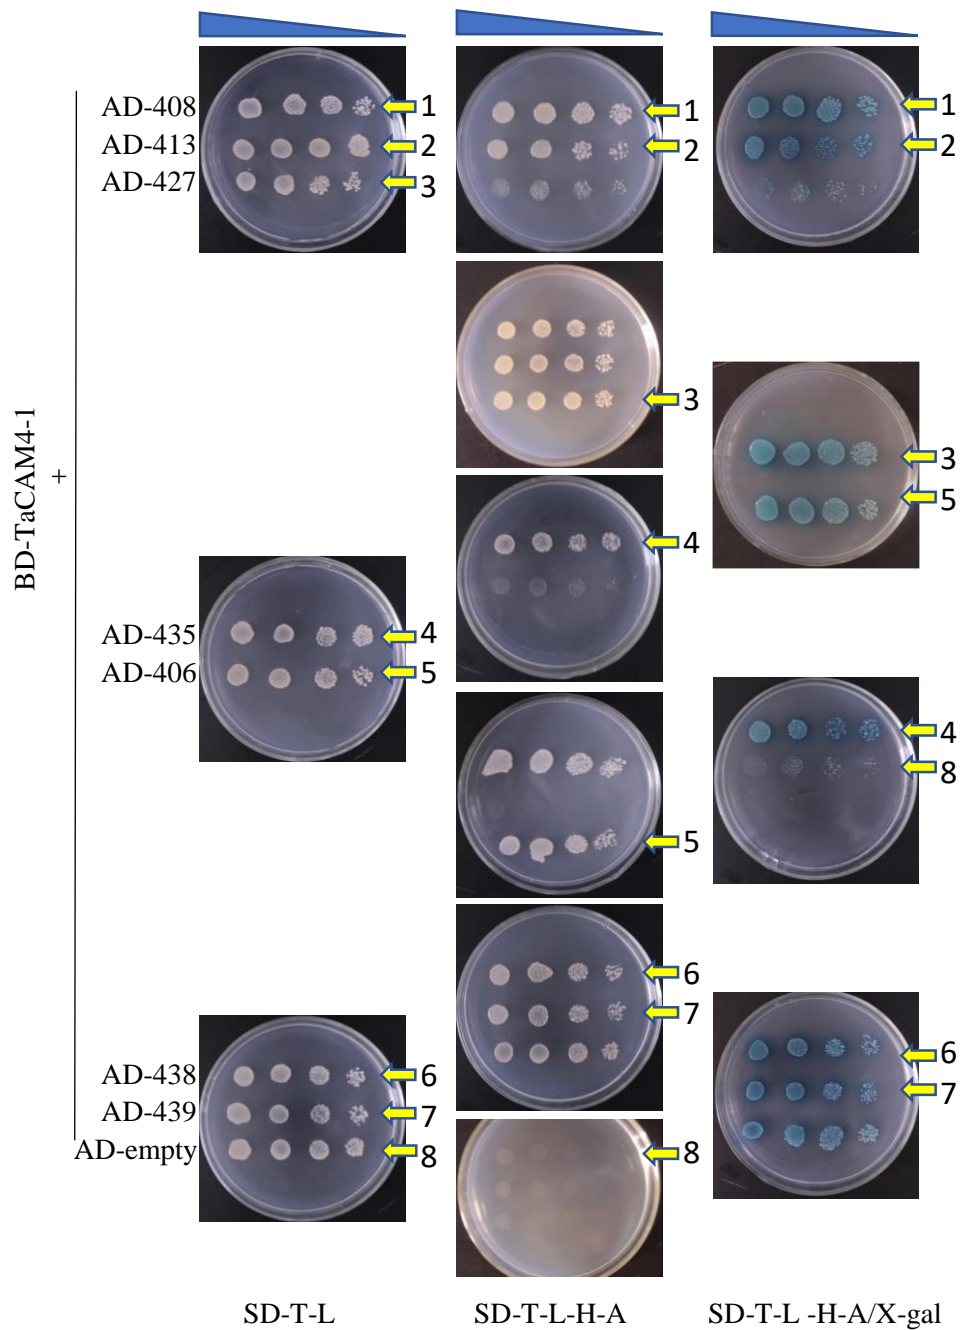

**S2 Figure. TaCAMTA4 interacted with TaCaM4-1 in EMSA**  
These are the original photos in Figure 2 B.

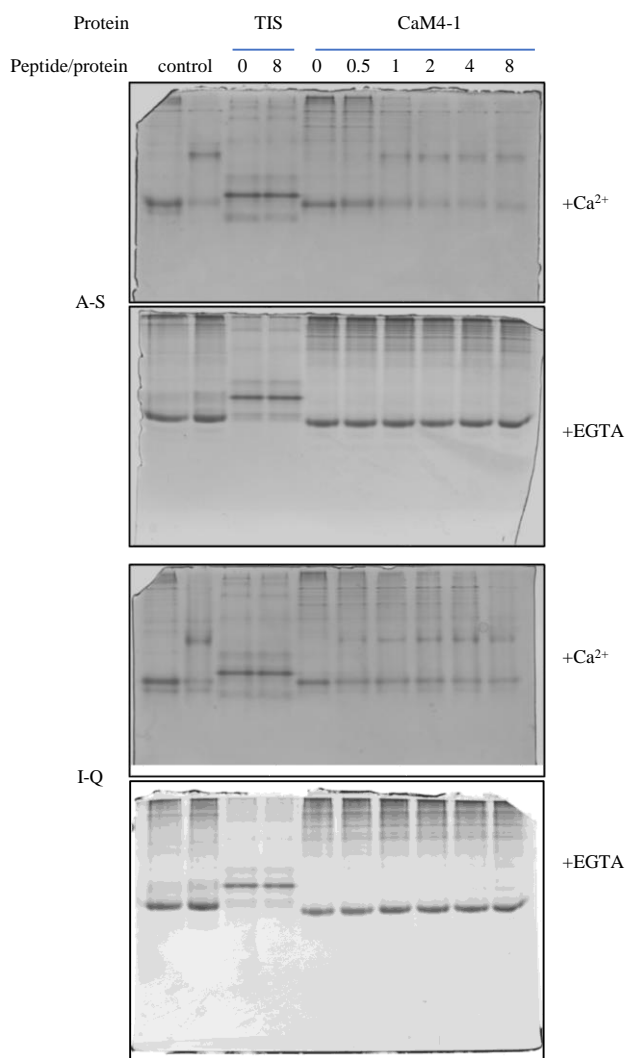

**S3 Fig. TaCAMTA4 cDNA full length nucleotide sequence.**

*TaCAMTA4* cDNA full length was 2704 bp and the open reading frame was 2505 bp shown in gray.

```

1      ATGCAGCAGC AGCAGCGGCA AGGTCACGAC ATACTAAATC TGCAGCGGGA GGTGAAGACG
31     CGGTGGCTCA AGCCCAGAGA GGTTCCTGAC ATATTGCAGA ACTGTGAGCT GTTCGGGATC
121    CAAAACAGGA CCCCTCAGAG GCCACCGAGT GGTTCCTGGT TCCTTTTCAA CCGTAGGGTA
181    CATCGCTTCT TCCGGAATGA TGGGTATGTG TGGCAGAAAA AGAAGAATGG GAAGAGCGGC
241    AATGAAGCAC ATGAGTACCT TAAGGTTGAT AATGTAAGG CTCTGAATTG CTACTATGCT
301    CGTGCAGAAA ATAATCCTAG ATTATGAGG CCGATATATT GGTGCTTGA ACCGGCTTAT
361    GAGCACATCG TTCTTGCCCA CTATAGAGAC GTTCTAGAGG GCAGCATTTC AGTATCAGTG
421    CTA AACGGTT CCCTCAACATC CAATCAGAAAT GGCAGTGCTA GCAGAGCTGA TGCACATAGT
481    TCGCCAGGGT TGA CTAGTGA GATAGTTGCG CCACTTCTCA ACTCGTGCAG CCCAGGATCC
541    GCGGAAGAAG TTAGTTCCCA GATCCCAGCC ATAAACAATG AAACAATGA TATAAGTCTA
301    TTTGATTGGC GCGGACACT TGAATGCAG CTGAGTCTGG AAAACAAGGA ACCTCATGAT
361    GTTAACACTG ATGAGGTTCT GCCAAATCAT GATCCTATT CTGCGCATGG GATACAGAAT
721    GAAGAAGTAC ACGCATGTAT AAACCTTGCA GATGTCTTTG ATCTGGGGTT TAGTGAAGAC
781    AACCATGCTG AAGGAAGTCA CCCTTATCCC GATCCTATCG ATGTCCTGAA ATATTAGAAA
341    ACATGGTTGG AGGATGACCA ACTTAAATCT ATTCTACATT CAGCTCCTGT GACAATTGAT
301    GAAAACCAAT GGTTCATCT TCATGAGGTT TCCTCAGAAAT GGGCATTITG TTCTGAAAGT
361    GCTAAGGTTG TCATTGTAGG AGATTTCCCT TGC AACCTCT CCAATAGTTC ATGGGTAFTA
1021   TTTGGTGATG TTAAGTACC TGCGGTAGTT GTCCAGCAAG GTGTCATCCG TTGTTATACT
1081   CCACCATACC TTGGTGCTGG AAAGGTGAGA ATGTGCATGC TCGATGAGAA TGGGAAACCT
1141   TGCATGGAAG ATCGAGAATT TGAATTCGTT GAAAAGCCTA CCAACACAAT GATTAATGGG
1201   AACGGGAAAC CCTGCAGTGA AGCAGGAGAA TTTGAATTC AACAGAGGCC TACCAAAAGT
1261   GACAATGGGC TGTGTGTGCT GATTAACTAT GTGCAGATGC TTTTGTAGT TCATGGCTGT
1321   GAACCTCTCT CAAAGTTCAG GTTGCCACTC CCAAATGCTC GGTCTGGATT CCCAGTTAAC
1381   CCCTCAGAGA TTATAGGGAG AACATGTGAG CAGTTGGACC ATGAGAATGC AGTAAATTGC
1441   ATCATGGAAG TGATGCTTAA CAATAAGTTC CAGGACTGGC TATCATCCAA ATTTGAACAG
1501   AATAGTGAAG GGGAGTATTT GCTTCCTAGG CAATACCATG GTGTGATACA TACAATTGCT
1561   GCATTGGGAT ACGACTGGGC TTTGAAACCG CTGCTTAGTA ACGGCGTGCC TATAAACTAC
1621   CGTGATGCAA ATGGATGGAC TGCTCTGCAT TGGGCTGCAC GATTCCGAA GGAACAAATG
1681   GTAGTGGTTC TTGTTGTTC AGGCGCTGCT GTGGGTGCAC TTTGAGATCC AACAGCGGAA
1741   GACCCTGCTG CCAAGCACCC TGCTTCGATT GCGTCTGCT ATGGTTTCAT AGGCATCTCT
1801   GCATTCCTTT CAGAAGCACA ACTAACCCAGT ACCCTTGATT CTCTGGAATC AAAAGAAAAT
1861   GGGAAAGCCCG TAGATCATAA TGTTGGAGTG AGTACATCTA ATGCTGTGGA TAGAGTATCA
1921   GATAAATGTG CACATGTGGA TGGTGGAACT GATGATCAGC TTGCACTTAA GGATTCTCTA
1981   GGAGCTATCC GAAATGCTGT TCAAGCTGCC GGACGCATAC AAGCTACCTT CCGTGTGTTT
2041   TCCTTAAAAA AGAAGAAACA AAAGGCTCTT CAGAATGGAG ATAGCTCTGC TTCGCCATCT
2101   ATGCTCGAAA GAGCTACATT ATCTATCCAG AAGAACTTCA GGTGCTGGAA GAAACGTAAG
2161   GAATATCAGA AAATTCGAAA AAATGTCATC AAGATTCAGG CACGGTTCAG AGCTACCCGA
2221   GAAAGAAACA AGTACAAGGA GTTACTTCAA AGTGTGGCA TCCTTGAGAA GATCATGCTG
2281   AGGTGGTTCC GAGAAGGTGT TGGTCTGCGA GGAATCAATA GCAGGGCGAT GCCAATCGAC
2341   CAAGACCAGA AAGAAGACAT CGTCAAGGTT TTCCGCAAGG AAAGAGTGGG AACAGCTGTC
2401   AGTGAGGCTG TTTTCGAGGT ATCGGCTATC GTCCGGTTGCC CTGTCCGCAAG GCTAGACTAC
2461   CGCAGGATGC TCGAAATGCA CCAACAAGCA AAGGTGAGGC CATGATCCGT GGTGTCTACT
2521   GAAGGGCTTT CAGTCAAAAA CTTGCTGAAG CAATAGCAGA TTTACGAGCG AAAAATCTAC
2581   TCCATATGTC TACTGTCTAG CACTTTGTGC ATGATATTTT GCAACTTATT TATCTCTTIG
2641   AACTTACTCA AAAAAAAAAA AAAAAAAAAA AAAAAAAAAA TGTCGGCCGC CTCCGGCCTT
2701   CTAG

```

### S4 Fig. Alignment of TaCAMTA4 and other homologous CAMTAs.

Comparative analysis between TaCAMTA4 and CAMTA sequences in other species. The amino acid residues that are conserved among different CAMTA proteins were colored dark blue. Gm for *Glycine max*, Vv for *Vitis vinifera*, Sl for *Solanum lycopersicum*, Bd for *Brachypodium distachyon*, Os for *Oryza sativa* Japonica Group.

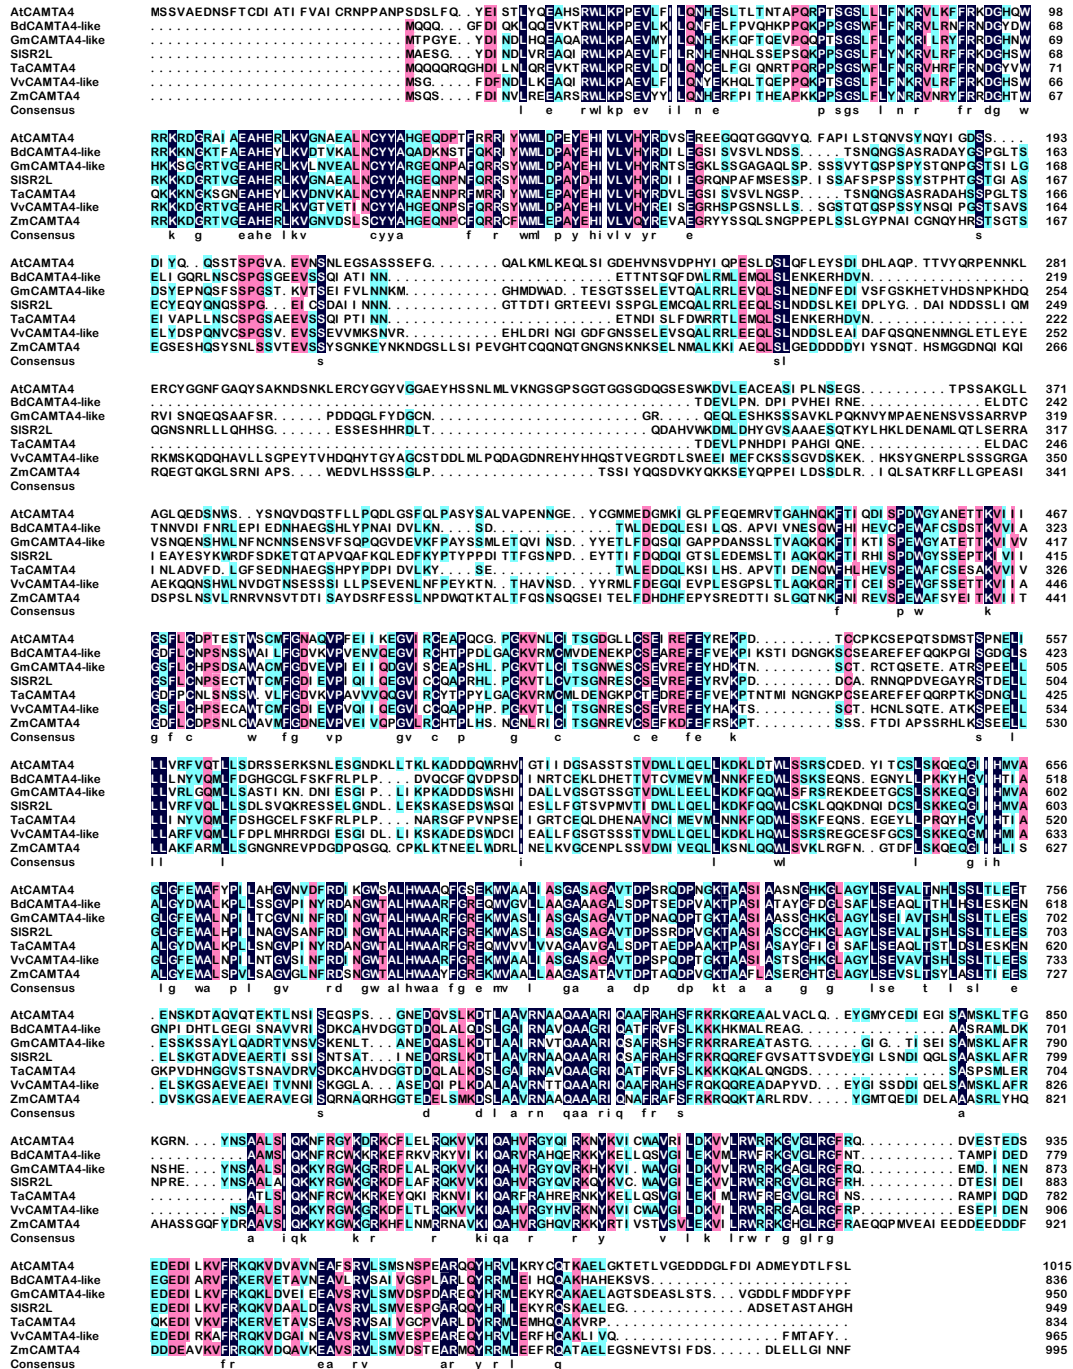

**S5 Table. Blastn results of *TaCaM4-1* screened genes.**

| <b>Gene Code</b> | <b>Description</b>                                                                                 | <b>Code</b> | <b>Number</b> |
|------------------|----------------------------------------------------------------------------------------------------|-------------|---------------|
| AK332814.1       | <i>Triticum aestivum</i> cDNA, clone: SET1_O14, cultivar:<br>Chinese Spring                        | 406         | 1             |
| AK374070.1       | <i>Hordeum vulgare</i> subsp. Vulgare mRNA for predicted<br>protein, complete CDS, clone: NIASHv16 | 408         | 6             |
| AK334410.1       | <i>Triticum aestivum</i> cDNA, clone: WT009_J02, cultivar:<br>Chinese Spring                       | 413         | 1             |
| AK331952.1       | <i>Triticum aestivum</i> cDNA, clone: WT002_M11, cultivar:<br>Chinese Spring                       | 427         | 1             |
| AK252052.1       | <i>Hordeum vulgare</i> subsp. vulgare cDNA clone: FLbaf143h10                                      | 435         | 2             |
|                  | No significant similarity found                                                                    | 438         | 3             |
| AK335614.1       | <i>Triticum aestivum</i> cDNA, clone: WT013_F15, cultivar:<br>Chinese Spring                       | 439         | 3             |

**S6 Table. Principal primers used in this study.**

| <b>Primers name</b>      | <b>Sequence</b>                                                 |
|--------------------------|-----------------------------------------------------------------|
| TaCAMTA4 (For 5'RACE)    | F: CACCTTCTCGGAACCACCTCAGC<br>R: CGAGCATAGATGGCGAAGCAGAG        |
| TaCAMTA4 (qRT-PCR)       | F: CTCTGCTTCGCCATCTATG<br>R: CCGTGCCTGAATCTTGAT                 |
| TaCAMTA4 (DNA-binding)   | F: CGGAATTCCGGCAAGGTCACGACATAC<br>R: CCAAGCTTTGTTGGCGAACCGTTTAG |
| EF1a (RT-qPCR)           | F: ATGCTGGCATAGTGAAGATG<br>R: AACAGTAGCAAACTTGAC                |
| TaCAMTA4 (qRT-PCR, VIGS) | F: ATCCGTGGTGTCTACTGAAG<br>R: TCATGCACAAAGTGCTAGAC              |
